# 1 **A massively multi-scale approach to characterising tissue architecture** 2 **by synchrotron micro-CT applied to the human placenta**

3 W. M. Tun<sup>1,†</sup>, G. Poologasundarampillai<sup>2,†</sup>, H. Bischof<sup>3</sup>, G. Nye<sup>4</sup>, O. N. F. King<sup>1</sup>, M. Basham<sup>1,5</sup>, Y. Tokudome<sup>6</sup>, R.  
4 M. Lewis<sup>7</sup>, E. D. Johnstone<sup>3</sup>, P. Brownbill<sup>3,\*</sup>, M. Darrow<sup>8,\*</sup>, and I. L. Chernyavsky<sup>3,9,\*</sup>

5 <sup>1</sup>Diamond Light Source, Didcot OX11 0DE, UK.

6 <sup>2</sup>School of Dentistry, University of Birmingham, Birmingham B15 2TT, UK.

7 <sup>3</sup>Maternal and Fetal Health Research Centre, School of Medical Sciences, University of Manchester; MAHSC, St Mary's  
8 Hospital, NHS MFT, Manchester, M13 9WL, UK.

9 <sup>4</sup>University of Chester, Chester CH1 4BJ, UK.

10 <sup>5</sup>Rosalind Franklin Institute, Didcot OX11 0DE, UK.

11 <sup>6</sup>Osaka Prefecture University, Osaka 599-8531, Japan.

12 <sup>7</sup>University of Southampton, Faculty of Medicine, Southampton SO16 6YD, UK.

13 <sup>8</sup>SPT Labtech Ltd, Melbourn SG8 6HB, UK.

14 <sup>9</sup>Department of Mathematics, University of Manchester, Manchester M13 9PL, UK.

15

16 † These authors contributed equally to the work.

17 \* Joint lead authors.

18 Correspondence emails: [igor.chernyavsky@manchester.ac.uk](mailto:igor.chernyavsky@manchester.ac.uk); [Michele.C.Darrow@gmail.com](mailto:Michele.C.Darrow@gmail.com); [Paul.Brownbill@manchester.ac.uk](mailto:Paul.Brownbill@manchester.ac.uk)

19 **Keywords: placenta, vascular tissue, computed tomography, machine learning, multi-domain segmentation, dual**  
20 **network flow, spatial statistics, stochastic geometry, U-Net, perfusion, contrast agent**

## 21 **ABSTRACT**

22 Multi-scale structural assessment of biological soft tissue is challenging but essential to gain  
23 insight into structure-function relationships of tissue/organ. Using the human placenta as an  
24 example, this study brings together sophisticated sample preparation protocols, advanced  
25 imaging, and robust, validated machine-learning segmentation techniques to provide the  
26 first massively multi-scale and multi-domain information that enables detailed  
27 morphological and functional analyses of both maternal and fetal placental domains. Finally,  
28 we quantify the scale-dependent error in morphological metrics of heterogeneous placental  
29 tissue, estimating the minimal tissue scale needed in extracting meaningful biological data.  
30 The developed protocol is beneficial for high-throughput investigation of structure-function  
31 relationships in both normal and diseased placentas, allowing us to optimise therapeutic  
32 approaches for pathological pregnancies. In addition, the methodology presented is  
33 applicable in characterisation of tissue architecture and physiological behaviours of other  
34 complex organs with similarity to the placenta, where an exchange barrier possesses  
35 circulating vascular and avascular fluid spaces.

## 1 I. INTRODUCTION

2 Understanding complex vascular-rich organs such as the placenta has traditionally  
3 necessitated the adoption of multiple parallel imaging-based approaches, applied  
4 correlatively to gain structural and functional understanding of the tissue. These approaches  
5 generally require balancing resolution with sample volume. Structural analyses of placental  
6 vessels from whole organ or single villous branches have been conducted using multiple  
7 imaging modalities [1, 2] including CT angiography [3], micro-CT [4, 5], confocal laser  
8 scanning microscopy [6] and fluorescent CLSM [7]. Each of these methods has positives and  
9 negatives associated with it, however, none of them provide access to 3D micro-structures  
10 *in situ*, at high enough resolution to resolve the blood vessels, or functional units of the  
11 placenta, and still provide contextual information of the tissue.

12 Segmenting biological image data is a major challenge due to the structural complexity and  
13 intra/inter sample heterogeneity [8, 9]. Manual segmentation is commonly used for  
14 biological data segmentation, however, as the number and size of datasets increases this  
15 approach has become increasingly impractical [10]. Thus, an automatic or semi-automatic  
16 segmentation algorithm with high accuracy is required for high throughput segmentation of  
17 biological structure.

18 As one of the most complex vascular organs of the human body, the placenta is a well-suited  
19 model system for development of 3D imaging pipelines. The human placenta is an exchange  
20 organ with a large surface area of the feto-maternal interface packed in a relatively small  
21 volume, and an extensive feto-placental vascular network [11]. Its tightly integrated  
22 structural constituents span the spatial range from  $\sim 10^{-6}$ – $10^{-1}$  m, necessitating a truly  
23 massive multi-scale imaging modality. Thus, new experimental and theoretical approaches  
24 are needed to bridge the microstructure of the placental exchange barrier and its  
25 macroscopic organ-level function, including the three-dimensional characterisation of the  
26 mesoscopic (between  $\sim 0.1$ – $1$  mm) tissue domain [1, 11].

27

28 In this study, synchrotron X-ray imaging is used in combination with various sample  
29 processing conditions, including tissue contrast agents, vascular cast resins, fixation and

1 embedding methods to generate high resolution massively multi-scale datasets of the human  
2 placenta. We then apply machine learning-based segmentation techniques for robust and  
3 efficient decomposition of maternal and fetal micro-domains in the large ( $\approx 8 \text{ mm}^3$ ) datasets.  
4 Finally, spatial statistics and flow simulations of the fetoplacental vascular network and  
5 associated intervillous porous space of the placental tissue are presented, and the results are  
6 validated against other modalities such as traditional 2D stereology analysis and *in vivo*  
7 magnetic resonance imaging.

8  
9 The developed protocols for 3D multi-domain characterisation of tissues presented here,  
10 using the human placenta as an example, will enable more direct hypothesis-testing of the  
11 structure–function relationship in other organs where there are complex physiological  
12 fluidic/exchanger systems, such as in the kidney, lung, lymphatics, spleen, central nervous  
13 system, gut, bone-marrow and in wound healing and tumour biology.

14

## 15 **II. RESULTS**

### 16 **A. Morphological study of mesoscopic placental tissue**

#### 17 **(i). Comparative analysis of tissue preparation for X-ray micro-tomography (micro- 18 CT) of complex soft tissues**

19 Preparation of placental specimens for synchrotron micro-CT requires careful fixation,  
20 perfusion, staining and dehydration/embedding (Figure S1). Here we apply and qualitatively  
21 evaluate various specimen preparation methods to successfully image the complex  
22 architecture of human placenta (Figure 1). Tissue zinc-based fixative Z7 applied to all  
23 specimens provides tissue contrast when in-line phase contrast synchrotron imaging is  
24 performed (Figure S2). Specimen 2 (Figure S2A, D, G-J), fresh frozen by plunging in liquid  
25 nitrogen, preserves the physiological structures. Placental architectures, including a well  
26 resolved syncytiotrophoblast, blood vessels, capillaries, red blood cells and stroma can be  
27 differentiated in the 2D cross sectional and 3D rendered images. The syncytiotrophoblast  
28 appears as a thin ( $\sim 3 \mu\text{m}$ ) envelope around an intermediate villous (Figure 2G). It is also

1 possible to observe aggregated nuclei within a syncytial knot (Figure 2G-J). In Specimen 3  
2 (Figure S2B, E, K-L) which was fixed with tissue fixative Zinc-7, ethanol dehydrated and wax-  
3 embedded, blood vessels, stroma and separately resolved microvillous and  
4 syncytiotrophoblasts are visible. Rendered 3D volumes in Figure S2K seem to show the  
5 presence of pores/open channels on the syncytiotrophoblast [12] which envelopes an  
6 intermediate villous circled in Figure S2L. From here, a machine-learning algorithm (U-Net)  
7 can be applied to segment and quantify the intervillous space (IVS) but not the vascular  
8 network or the stroma. Additional staining with 1% phosphotungstic acid (PTA) solution can  
9 further enhance the contrast for stroma (Figure S2F; Specimen 4) making it segmentable.  
10 PTA solution has low viscosity and so infiltrates into the IVS but takes several days (3 days  
11 for an 8 mm<sup>3</sup> sample) to provide good contrast and signal-to-noise.

12 In order to confidently segment the complex 3D vascular network resin infiltration casting  
13 via the fetal villi network is required to give sufficient contrast and phase differences.  
14 Specimens 1 (Figure S2C) and 3 (Figure S2B, E, K-L) were Zinc-7 fixed and perfused via the  
15 fetal side with casting resins (Batson's and Yasuaki's resins for Specimen 1 and 3,  
16 respectively), then ethanol dehydrated and wax-embedded. Batson's contrast agent  
17 penetrates deeply into the fetoplacental circulation (Figure S2C) but shrinks inside larger  
18 vessels and possibly over-inflates smaller vessels, due to the high exertion force needed to  
19 infuse the resin via the fetal arterial cannula. Yasuaki's resin is less viscous and highly has  
20 high X-ray attenuating than Batson's and shrinks less, thereby likely better preserving vessel  
21 diameters. Both agents give good contrast to highlight the fetal lumen (Figure S2B, C). The  
22 viscosity of both Batson's and Yasuaki's reagents make them unfavourable for infusion into  
23 the IVS since filling is incomplete. Extent of tissue processing influences final architecture.  
24 Ethanol dehydration and wax embedding (Specimen 3 and 4) may introduce tissue  
25 deformation, in particular the villous trophoblast appears to delaminate from the villi stroma  
26 (Figure S2B, E). Tissue deformation occurred to much less extent with CP-dried specimens  
27 (Specimen 1; Figure S2C). Whilst, cryo-freezing seems to have caused syncytiotrophoblast  
28 shedding to occur, but overall it has preserved the morphology of specimens more than the  
29 other methods. However, synchrotron micro-CT imaging of cryo-frozen specimens requires  
30 a cryo-stream or cold stage to maintain the specimen at cryo-condition during scanning.

1 Figure S1A provides a summary of various sample processing conditions tested here and a  
2 flow chart (Figure S1B) that recommends appropriate processing pipelines to resolve the  
3 multiscale structures in the placenta.

#### 4 **(ii). Characterisation of feto-placental vascular network in 3D**

5 Feto-placental vascular network and porous materno-placental tissue domain were  
6 quantified in 3D for Specimen 1 (normal) and Specimen 2 (pregnancy with fetal growth  
7 restriction, FGR). The scanned 9 mm<sup>3</sup> cubed samples generated  $\approx 8$  mm<sup>3</sup> of digital 3D data.  
8 The entire volume (14.2 billion voxels) was segmented and analysed to identify placental  
9 tissue architecture across multiple scales (Figure 1 and Supplementary Video 1). A  
10 disambiguated 3D rendering (Figure 1B) from the entire volume of tissue demonstrated the  
11 sample tissue volume and three-dimensionality achieved with the technique, while the detail  
12 in the terminal capillary loops and surrounding villous tissue (Figure 1G) demonstrated the  
13 resolution. Two separate 2D U-Nets (Figure S1) were used alongside expert-generated  
14 training data (Figure S3) to fully segment the feto-placental vascular network and the  
15 maternal and fetal blood volumes (Figure 1C, E, F, G).

16 Once the complex tissue was segmented, multiple data analysis pipelines and simulations  
17 could be run, across the imaging scales. Figure 2 displays the skeletonized vascular structure  
18 from the entire tissue dataset (2A), a small cropped region (2B) and a single connected tree  
19 (2C). The median (interquartile range; IQR) diameter of blood vessels in fixed tissue is 6.8  
20 (IQR: 6.2–8.6)  $\mu\text{m}$  for the entire network and 4.4 (IQR: 3.4–6.0)  $\mu\text{m}$  for a single connected  
21 tree (Figure 2D), while the length of blood vessels is 73.8 (IQR: 47.4–115.6)  $\mu\text{m}$  for the entire  
22 network and 21.2 (IQR: 13.6–34.1)  $\mu\text{m}$  for a single connected tree (Figure 2E). Tortuosity of  
23 the blood vessels is 1.2 (IQR: 1.1–1.4) for the entire network (Figure S4) and 1.2 (IQR: 1.1–  
24 1.3) for a single connected tree. A limitation in the current analysis is that skeletonization  
25 and quantification of blood vessels for the entire network (Figure 2A) was carried out on  
26 down-sampled image data due to computational limitations. Therefore, the measurements  
27 from the entire vascular network are likely to be less accurate in comparison to those from  
28 the single connected tree, where the full resolution data was used.



## 1 B. Characterisation of the porous materno-placental tissue domain in 3D

2 To characterize the maternal blood porous space, the centre region of the scan,  $\approx 1.8 \text{ mm}^3$   
3 from the entire data set (see supplementary Figure S3A) and the porous space that  
4 encompasses the single connected tree (from Figure 2C) were used. The median  
5 (interquartile range; IQR) diameter of pores is 72.2 (IQR: 50.6–97.2)  $\mu\text{m}$  for the central  
6 region and 57.6 (IQR: 40.6–77.8)  $\mu\text{m}$  for the single tree region. The diameter of the throat (a  
7 throat is a region that connects two individual pores) is 27.0 (IQR: 14.4–43.6)  $\mu\text{m}$  for the  
8 central region and 31.0 (IQR: 16.8–47.0)  $\mu\text{m}$  for the single tree region. The distributions of  
9 diameter of porous regions and connecting throats of both the central region and the region  
10 that surrounds the single connected tree (both from specimen 1) are shown in Figure 2H and  
11 2I.

12

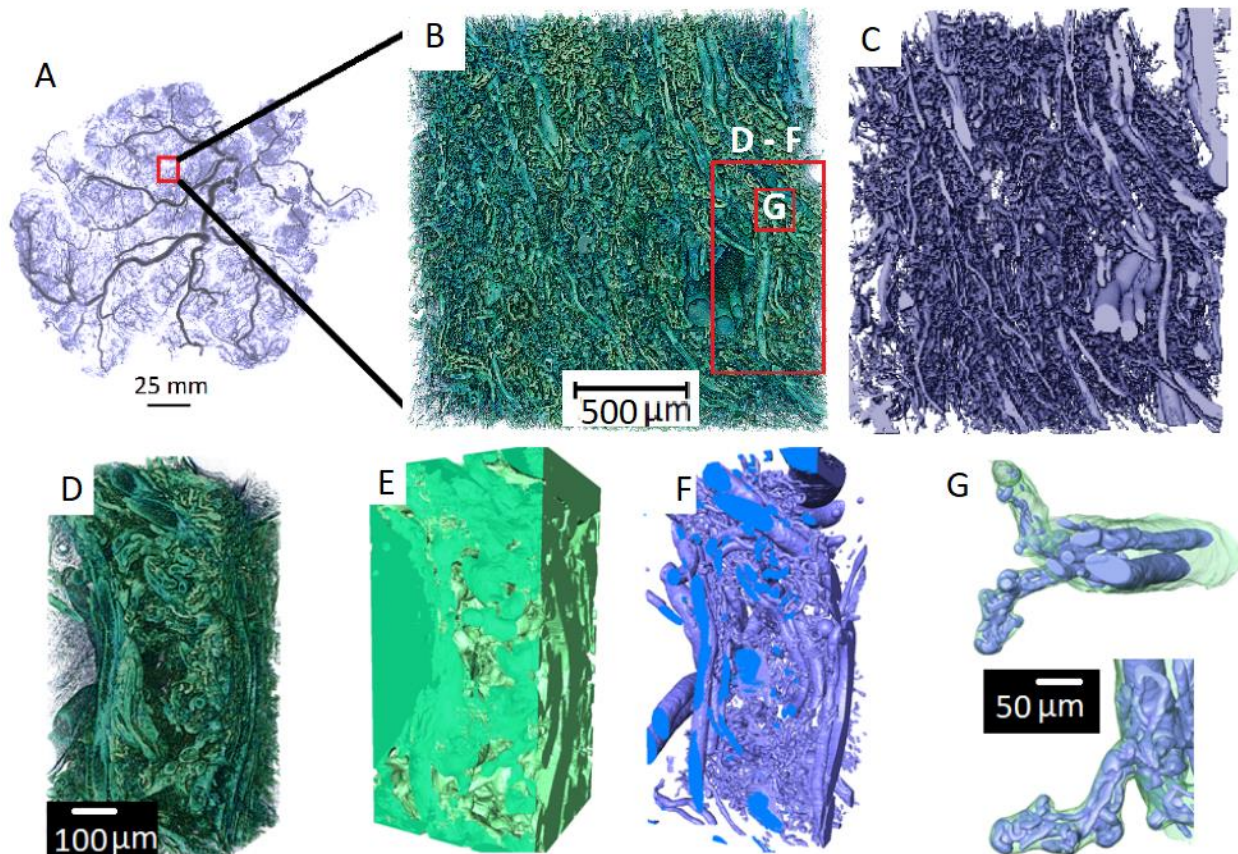

13

1 **FIG. 1: Multi-scale tissue architecture of placental tissue from synchrotron micro-CT.**  
2 (A) Placental cast under micro-CT [unpublished image from [5]]. (B-G) Images  
3 demonstrating the complex hierarchical architecture of the human placenta (Specimen 1,  
4 normal placenta at term). (B) 3D rendering of  $\approx 8 \text{ mm}^3$  human placental tissue. (C) Fetal  
5 vascular network segmented from placental tissue using a U-Net algorithm. (D-F) A small  
6 section of the placental tissue was cropped from the original dataset (red box in B) and 3D  
7 rendered. (D) 3D rendering of  $\approx 0.2 \text{ mm}^3$  tissue showing different hierarchical features. (E)  
8 U-Net segmented fetal tissue component, (F) fetal vessels and (G) fetal capillary network  
9 with surrounding villous tissue overlaid.

10 The median and interquartile ranges of diameter of pore and throat, length of throat and  
11 number of connected pores were also analysed for both Specimens 1 and 2, and the results  
12 are presented in supplementary Figure S5. These analyses were performed on central tissue  
13 regions only.

14 The flow tortuosity of porous regions was plotted with different minimal lengths. The  
15 smallest minimal length employed here ( $85 \mu\text{m}$ ) is bigger than the mean diameter of a pore  
16 ( $\approx 80 \mu\text{m}$ ) since the blood flow inside a single pore is considered straight. Supplementary  
17 Figure S6G shows that the porous tortuosity falls between 1 and 3 in both Specimen 1 and 2.

### 18 **C. Mesoscopic flow analysis in the human placenta**

19 Using Specimen 1, the maternal flow velocity in the IVS was simulated for a fixed pressure  
20 gradient applied in three principal directions (Figure 3 and Supplementary Video 2). The  
21 relationship between fetal tissue (Figure 3A(i)) and maternal flow (Figure 3A(ii)) in velocity  
22 map and streamlines respectively and the inter-relationship between maternal flow  
23 streamlines (Figure 3B) and fetal vascular network (Figure 3C) were visualized. The  
24 distribution of flow velocities (Figure 3D) were in the range 0–1670 (mean: 8)  $\mu\text{m/s}$  in the x  
25 direction, 0–1670 (mean: 10)  $\mu\text{m/s}$  in the y direction, and 0–1660 (mean: 7)  $\mu\text{m/s}$  in the z  
26 direction respectively.

27 Despite the approximately 1:2:1 (x:y:z) aspect ratio of the studied porous domain, the flow

1 resistance in the y direction was found to be approximately twice as small as in the x and z  
2 directions, with the corresponding diagonal components of the empirical hydraulic  
3 permeability tensor  $\approx(1.5, 3.4, 2.0) \mu\text{m}^2$ , indicating a relatively strong flow anisotropy of the  
4 IVS.

5 The connectivity of the IVS domain was also explored as a function of the minimal pore-  
6 throat diameter needed to connect a random central pore to the periphery of the domain  
7 (Figure S6A-F). Such critical diameter was found to be just about 25% of the pore size,  
8 pointing to a highly connected IVS that facilitates flow-limited transport at the tissue  
9 mesoscale of  $\sim 1$  mm (see S8 in the Supplementary Text for more details).

#### 10 **D. Uncertainty quantification and scale-dependence of morphological metrics**

11 Placental tissue area fraction fluctuates across the 3D volume in both specimens. Based on  
12 the central tissue region ( $\approx 1.8 \text{ mm}^3$ ), the area fraction of Specimen 1 ranges from 0.54–0.73  
13 (mean: 0.64) and that of Specimen 2 ranges from 0.58–0.71 (mean: 0.65; see Figure 4A and  
14 Supplementary Figure S7A, B). The tissue volume fractions for Specimens 1 and 2 are 0.64  
15 and 0.65 respectively. Figure 4B shows how the standard deviation of the volume fraction  
16 decreases with increasing ROI size (see also Figure S7C). The scale-dependent error in fetal  
17 tissue volume fraction, specific surface area (Figure 4C) and the 2-point correlation function  
18 vs. distance for both specimens (Figure 4D) are also presented.

19 Figure 4C illustrates that the relative magnitude of fluctuations in both the tissue volume  
20 fraction and specific surface area fall approximately inversely proportional to the square  
21 root of the ROI volume ( $\sigma/\mu \sim V_{\text{ROI}}^{-1/2}$ ) for the sufficiently large ROI size (compared to the  
22 characteristic lengthscale  $\lambda \sim 200 \mu\text{m}$ ; see Figure 4D and Table 1). This is in agreement with  
23 theoretical predictions for a generic porous medium (see S9 in the Supplementary Text for  
24 more details). Thus, to reduce the estimation error in morphological metrics by a factor of 2,  
25 a four-fold increase in the ROI volume is required. For smaller ROI volumes (i.e. when the  
26 ROI size is less than ca.  $200 \mu\text{m}$ ), the morphometric fluctuations are even more sensitive to  
27 the measurement scale.



1 Three-dimensional (3D) morphometrics were also compared to the estimates based on two-  
2 dimensional (2D) 'virtual' stereology (Figure S8) on the same dataset to cross-validate the  
3 estimated tissue volume fractions and specific surface areas between these two approaches.  
4 Table 1 reports the villous tissue volume fraction and specific surface area for Specimen 2  
5 estimated by traditional 2D stereology and 3D morphological analysis. Comparison to the  
6 direct 3D estimates (Table 1) shows good agreement for the volume fraction but an up to  
7 40% relative difference for the specific surface area.

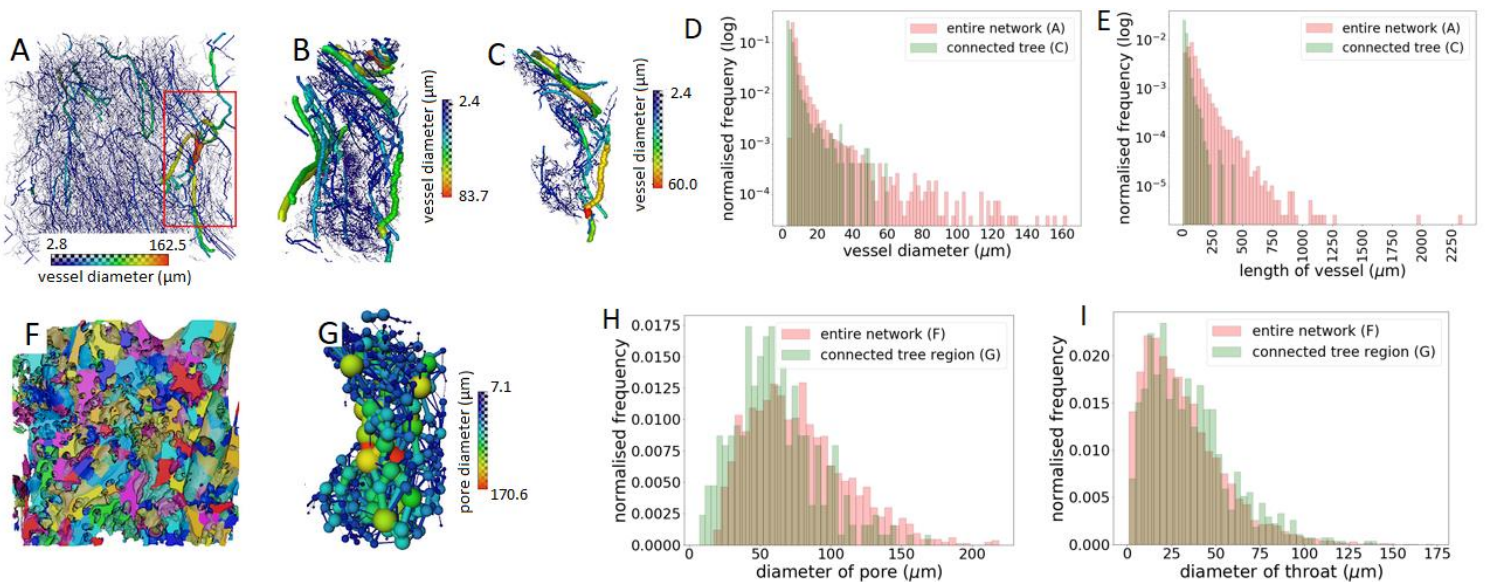

8

9 **FIG. 2: 3D analysis of the structure of the fetal vascular network and maternal porous**  
10 **space (Specimen 1, normal placenta at term).** (A & B) Skeletonized vascular structure  
11 from the entire tissue volume and from a small cropped region (the red box in A). (C) shows  
12 a single connected vascular tree in the cropped region shown in B. (D & E) Distributions of  
13 vessel diameter and length of blood vessels from the entire fetal vascular network and the  
14 connected vascular tree shown in A and C respectively. (F) Porous regions in the central  
15 tissue region ( $\approx 1.8 \text{ mm}^3$ ). The colors represent different porous regions but are not related  
16 to the sizes of the pores. (G) Ball and stick model to represent pores and throats in the  
17 cropped region as in C. (H & I) Distributions of diameters of porous regions and connecting

1 throats in the central tissue region and the region that encompasses the single connected  
2 tree in *C*.

3 **TABLE 1: Comparison of 2D- and 3D-based placental tissue morphometrics (Specimen**  
4 **2; see Figs S7 & S8 for more details).**

| Structural metric                                                                 | 2D stereology<br>(mean $\pm$ SD)            | 3D micro-CT     |
|-----------------------------------------------------------------------------------|---------------------------------------------|-----------------|
| Volume fraction <sup>a</sup>                                                      | 0.67 $\pm$ 0.04                             | 0.65            |
| Slice-averaged area fraction <sup>b</sup>                                         | N/A                                         | 0.65 $\pm$ 0.03 |
| Specific surface area ( $S_v$ , $\mu\text{m}^{-1}$ ) <sup>c</sup>                 | 0.028 $\pm$ 0.006<br>(range: 0.017 – 0.037) | 0.045           |
| Characteristic correlation lengthscale ( $\lambda$ , $\mu\text{m}$ ) <sup>d</sup> | N/A                                         | $\approx$ 200   |

5 <sup>a</sup> Based on the 2D ROI area of  $\approx 1.46 \times 1.46 \text{ mm}^2$ .

6 <sup>b</sup> Based on the central ROI volume of  $\approx 1.22 \times 1.22 \times 1.22 \text{ mm}^3$ .

7 <sup>c</sup> Based on the ROI area of  $\approx 0.44 \times 0.44 \text{ mm}^2$ .

8 <sup>d</sup> The distance at which the mean of normalized autocorrelation function falls below 1%.

9 N/A indicates the technique is not applicable.

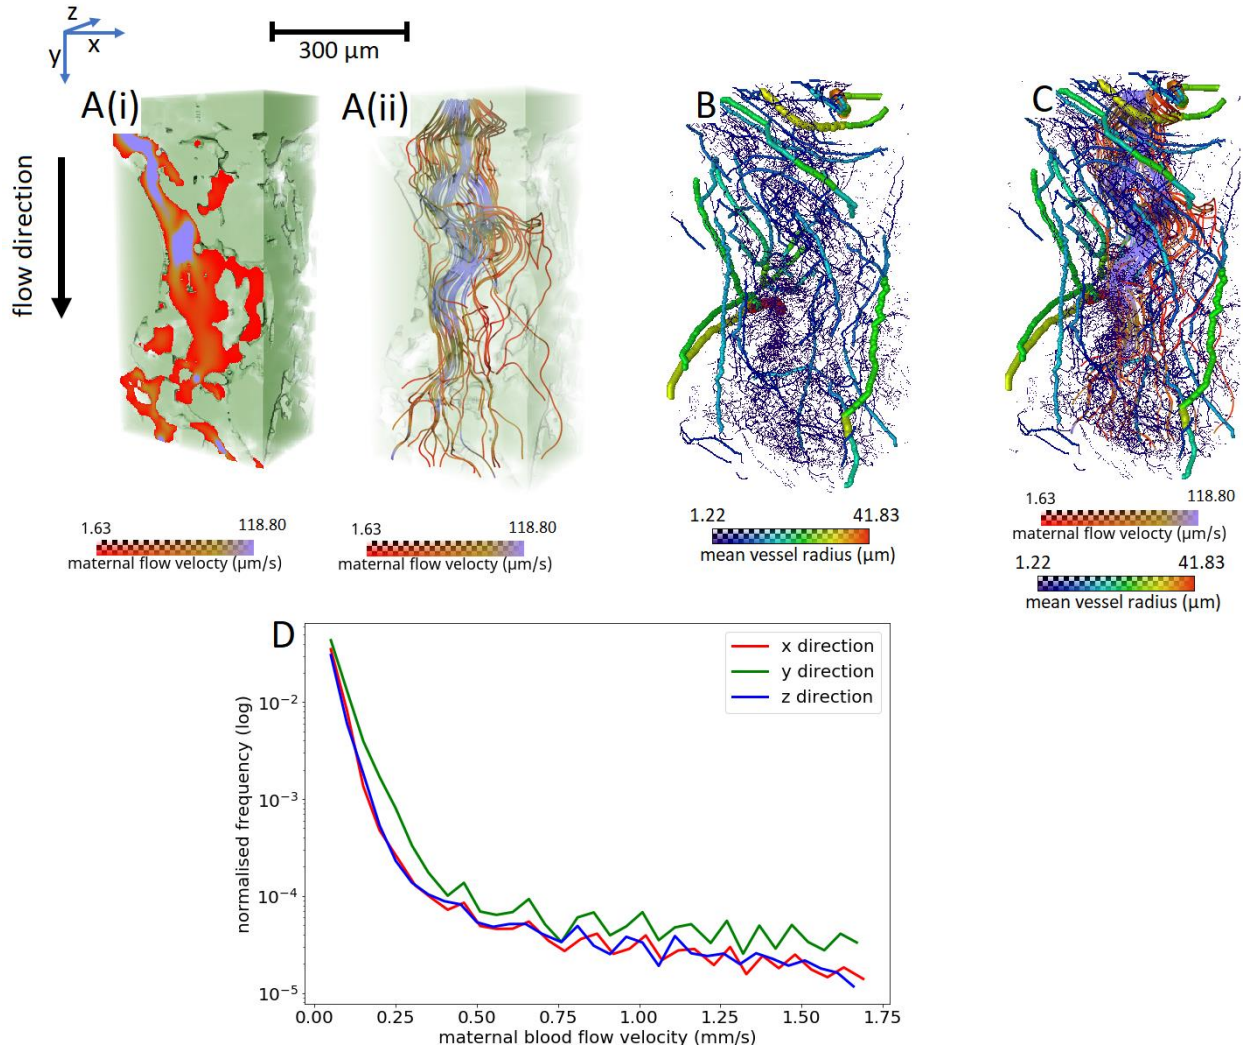

1  
2 **FIG. 3: Flow simulations across maternal IVS to visualize the inter-relationship**  
3 **between maternal blood flow and fetal vascular flow (Specimen 1, normal placenta at**  
4 **term). (A) shows the maternal (i) flow velocity map and (ii) flow streamlines in the IVS. (B**  
5 **& C) show the inter-relationship of maternal flow streamlines and fetal blood vascular**  
6 **network. (D) Line graphs comparing the maternal blood flow velocity distributions in three**  
7 **different directions with a fixed pressure gradient. x-axis of the graph shows maternal blood**  
8 **flow velocity and y-axis shows the normalised frequency in logarithmic values.**

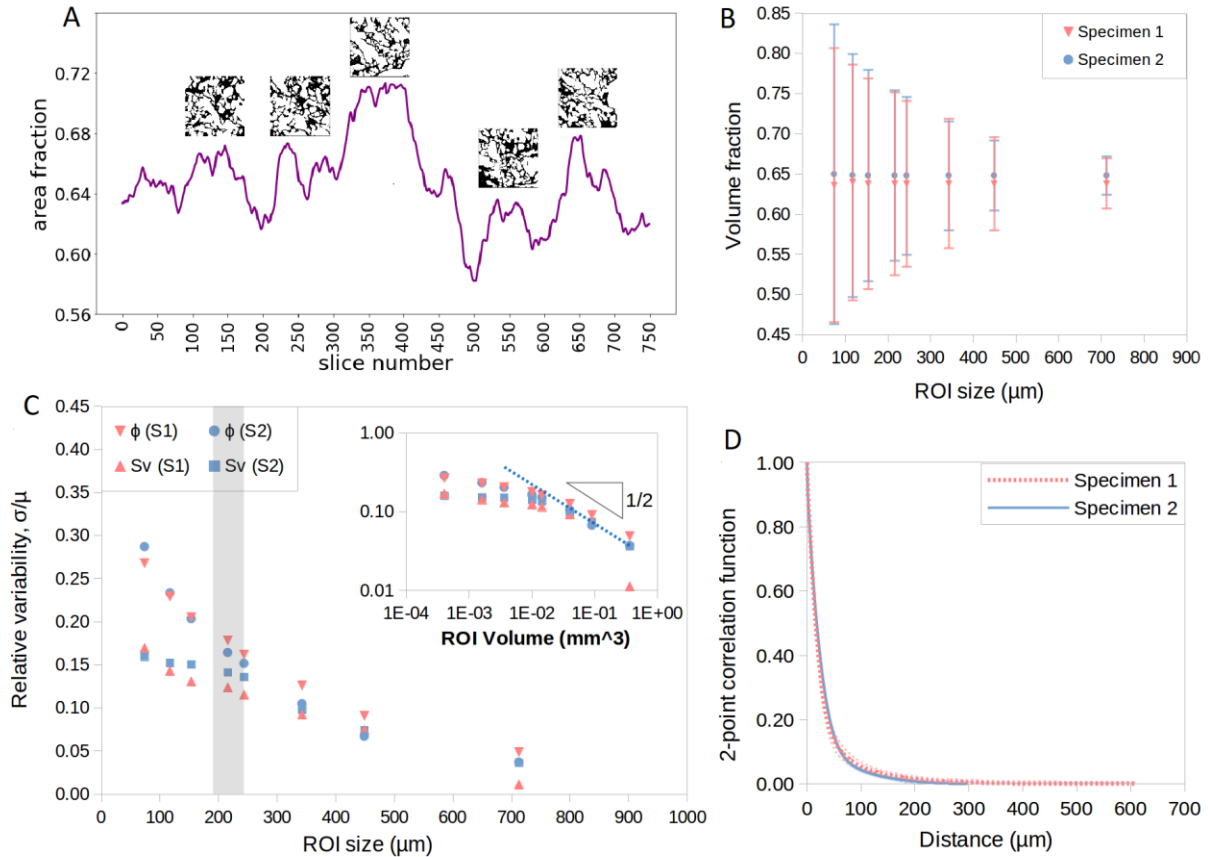

1  
2 **FIG. 4: Uncertainty quantification and scale-dependence of morphological metrics**  
3 **(Specimens 1 & 2).** (A) Fluctuations of placental villous tissue area fraction in Specimen 2  
4 for the region of interest (ROI) with the volume of  $\approx 1.22 \times 1.22 \times 1.22 \text{ mm}^3$  (insets illustrate  
5 selected slices). (B) Volume fraction fluctuations (mean $\pm$ SD) vs. effective ROI size. (C)  
6 Scale-dependence of a relative error in the tissue volume fraction ( $\phi$ ) and specific surface area ( $S_v$ )  
7 estimates; the inset compares to the theoretical prediction of  $\sim (\text{ROI Volume})^{1/2}$  on a  
8 logarithmic scale (see Supplement S9). (D) Radial two-point autocorrelation function (mean;  
9 SD is shown with shaded lines); the corresponding approximate transition range to  
10 uncorrelated meso-scale (mean autocorrelation  $\lesssim 1\%$ ) is shown as a grey stripe in C.

### 11 III. DISCUSSION

12 In this study, we present a novel approach to quantitatively characterise the 3D structure of  
13 complex mesoscale tissues using the human placenta as a model. We demonstrate how up to  
14 four orders of magnitude can be bridged in a single imaging dataset using synchrotron X-ray  
15 micro-tomography, and propose an optimized pipeline for tissue sample processing and  
16 image segmentation to robustly evaluate morphological data of complex vascular systems.

1 To our knowledge, this is the first study to characterise the maternal placental IVS porous  
2 region and to demonstrate the inter-relationship between maternal blood flow and fetal  
3 vascular network. Finally, we compare traditional stereological approaches with direct 3D  
4 structural analysis and quantify the scale-dependent fluctuations in common morphological  
5 metrics. The developed framework helps to identify a minimal characteristic size for  
6 heterogeneous placental and other complex soft tissues and provides the tools to control the  
7 associated uncertainties for robust and scalable predictions.

8 The placental specimens in this study were prepared using different tissue processing  
9 techniques (critical point (CP)-drying, fresh-frozen, wax-embedding) and perfused with  
10 different contrast agents (Batson's and Yasuaki's; Table S1). CP-dried and wax-embedded  
11 specimens showed more deformation and shrinkage of villous tissue in comparison to fresh-  
12 frozen specimens that maintained the tissue at near-native anatomical condition. Among the  
13 three processing techniques, CP-dried specimens displayed the best image contrast between  
14 fetal tissue and maternal IVS (Figure S2). Yasuaki's gave a superior contrast of the fetal  
15 vascular network than Batson's, meaning Yasuaki's-perfused specimens could be easily  
16 segmented with contrast-based image segmentation methods while Batson's-perfused  
17 specimens require more complex segmentation strategies. However, one drawback with  
18 Yasuaki's resin was lower perfusion efficiency which manifests as smaller arterioles and  
19 venules in the terminal capillaries. Sample processing must be considered in light of both the  
20 preservation of the region of interest, but also the downstream data analysis and  
21 segmentation strategy (Figure S1A). In an ideal case (Figure S1B, specimens would  
22 immediately be Z7 fixed, fetal network infiltrated with a resin, paraformaldehyde (PFA)  
23 fixed, and then cryo-frozen and micro-CT imaged under cryo-conditions. If a cryo-stage is  
24 not available then specimens should be ethanol dehydrated and CP-dried before imaging  
25 under ambient conditions. In order to segment the various structures a machine-learning  
26 algorithm (U-Net) should be employed. This proposed sample preparation and imaging  
27 pipeline would be applicable to other vascular-rich organs [13-15].

28 In recent years, automatic or semi-automatic segmentation methods using deep learning  
29 algorithms have become popular in the vascular biology [16] and placental biology fields



1 [17]. Convolution neural networks (e.g. U-Net) have been successfully applied in segmenting  
2 various vascular systems including retina [18, 19], brain [20], whole placental volume [21],  
3 and larger placental vessels [22]. Here for the first time, we apply a U-Net towards multi-  
4 domain segmentation of the intricate fetal vascular network and maternal porous space,  
5 including terminal capillary loops where vessel diameters are smaller than 50  $\mu\text{m}$ . The semi-  
6 automatic algorithm used here requires a minimal amount of training data ( $\approx 1\%$  of entire  
7 volume). The most striking aspect of the U-Net segmentation is the detection of the smallest  
8 terminal capillaries, with diameters of the fixed tissue as small as  $\approx 2.5 \mu\text{m}$  (IQR: 6.2–8.6).  
9 These tiny terminal capillaries are exceedingly difficult to segment manually, so their  
10 presence in the U-Net segmentation provides a less time-consuming and more consistent  
11 method for their inclusion in analyses.

12 The U-Net predictions were assessed by dice score coefficient, a commonly used voxel-based  
13 validation metric for image segmentation algorithms [23]. Using the dice score, comparisons  
14 between multiple manual expert segmentations of complex, biological components have  
15 varied between  $\approx 0.27$  and  $\approx 0.69$  [24]. When comparing the U-Net segmentations to expert  
16 manual validation segmentations, the dice scores for vascular and tissue regions are 0.8 and  
17 0.9 respectively (Figure S9). There are, however, some artefacts present in the U-Net  
18 segmentation (mislabelling of maternal porous region as fetal tissue) that could lead to  
19 overestimation of the surface area of fetal tissue. In addition, the current U-Net model was  
20 not able to generalize across datasets, instead requiring manual training data from each  
21 individual dataset. This may be due to the variation in specimen processing and imaging,  
22 which manifested significantly different appearances in the final datasets.

23 Understanding the structural development of the placenta is critical since the common  
24 pregnancy disorders FGR and pre-eclampsia are associated with impaired development of  
25 the placental vascular network [25, 26]. The human placenta is hemochorial and possesses  
26 a dual blood supply; maternal and fetal circulations are separated, but work collaboratively  
27 as a multi-villous exchange system [27]. Defects in either supply could impair nutrient and  
28 gaseous exchange. Here, we have quantified the continuous fetal vascular networks from a  
29  $\approx 8 \text{ mm}^3$  placental tissue block capturing the transition from the micro- to meso-scale, with

1 the size range of blood vessels and intervillous pores of the order of 10–1000  $\mu\text{m}$  (Figure 2).  
2 In order to appreciate the spatial inter-relationship between these two circulations, we have  
3 visualized the maternal flow intertwined with the fetal vascular network (Figure 3C). We  
4 simulated maternal blood flow in a large portion of the segmented intervillous pore space  
5 for a fixed pressure gradient of  $\sim 10$  Pa/mm within placental tissue [28, 29]. The predicted  
6 flow had an exponential distribution of velocities, typical for a random porous medium [30],  
7 with the range of  $\approx 0$ –2 mm/s. This is consistent with previous MRI *in vivo* estimations that  
8 reported regions of slow ( $< 0.5$  mm/s) and fast ( $> 1$  mm/s) blood flow [31]. Furthermore,  
9 our results suggest a new hypothesis that local IVS pore sizes influence nutrient and gaseous  
10 exchange efficacy. Future studies are needed to identify whether IVS porosity spatially  
11 correlates with the calibres and orientation of associated villous microvessels, and to  
12 determine the extent of maternal-fetal placental flow matching. The impact of villous tissue  
13 compliance on flow distribution in the IVS, particularly, in the proximity of decidual arterial  
14 inflows, also warrant further investigation.

15 With the intention of understanding the normal physiological blood flow and deviations  
16 occurring in diseased pregnancies, numerous mathematical and computational models have  
17 been developed and attempt to replicate the utero-placental circulations [11, 32-34]. A  
18 particular challenge is the geometric complexity of intervillous maternal porous regions  
19 which are difficult to characterize [33]; therefore, there is a lack of knowledge on placental  
20 porous structure. Porosity within human tissues has been extensively investigated in bone  
21 and other soft tissues (e.g. adipose tissue) from the perspective of tissue engineering [35-  
22 38]. Nonetheless, the placental maternal IVS porous medium has been less well studied.  
23 Here, we have quantified the size of porous regions, the connecting throats between  
24 individual pores, and the length of connecting throats. Moreover, we report the number of  
25 coordination for individual pores, and also visually examine the connectivity by thresholding  
26 the size of connected regions (Figure S6). Both qualitative and quantitative analyses suggest  
27 that the maternal porous space is highly connected and there is no unconnected, isolated  
28 porous region. The minimal diameter of throat is 0.86  $\mu\text{m}$  (IQR: 14.4–43.6), in line with the  
29 average thickness of a human red blood cell (0.8–1  $\mu\text{m}$ ), indicating blood flow could occur  
30 throughout the porous medium with some impedance [39]. However, the resistance to IVS

1 flow would vary depending on the length and diameter of connecting throats/pores,  
2 suggesting a potential explanation for the heterogeneous maternal flow velocity reported in  
3 [29] and also in our flow simulations.

4 Contrast imaging and mesoscopic flow analysis reported here could readily be applied to  
5 other organs where it is challenging to understand structure-function relationships when a  
6 fluid circulates around epithelia or where flow is not confined to a vascularised system. This  
7 type of anatomy can be found in the intestine and the central canal of the spine. In the gut,  
8 uptake of nutrients and therapeutic compounds occur from the crypts of the jejunum lumen,  
9 passing into the systemic circulation having traversed associated villi. The crypt lumen has  
10 been observed to become vacuolated following chemotherapy, altering their porosity, which  
11 is hypothesised to affect the efficacy of nutrient and therapeutic uptake [40]. In a second  
12 example, the motile cilia of the spinal cord central column and brain generate an efficiency  
13 of cerebrospinal fluid flow that is sensed and regulates structural modelling of the shape of  
14 an organism during embryonic development [41]. Thus, the workflow we have developed  
15 could provide anatomical insights on tissue structure and function in homeostasis and  
16 pathology.

17 It is important to note that the pore diameters measured here could be influenced by the  
18 flow and the hydrostatic pressure within the IVS during perfusion fixing, compared to non-  
19 perfusion fixed tissue, where villous and IVS deflation could occur [42]. Following partum,  
20 the placenta collapses and loses a significant volume of maternal blood from the IVS.  
21 However, a more physiological pressure and flow within the IVS *in vivo* can be recapitulated  
22 during *ex vivo* dual perfusion of the human placenta, yielding a more normal spatial  
23 arrangement of villi compared to the arrangement produced by the direct immersion fixing  
24 of deflated placental material. Consequently, most historic stereological analyses have likely  
25 under-estimated the volume fractions of the IVS in this tissue [42]. In turn this will have led  
26 to an under-representation of pore size diameter and connectivity characteristics. However,  
27 potential confounders of the *ex vivo* perfusion model relate to an artificial rheology, created  
28 by a blood-free environment, with some compromise in viscosity linked to altered shear  
29 stress within the two circulatory systems. One unresolved question is how to determine the

1 tissue sample size required to accurately obtain statistically-representative data. This is  
2 particularly true for placental tissue due to its inherent heterogeneous nature. While it is  
3 true that the larger the tissue section, the more information one can retrieve, using a large-  
4 sized sample comes with technical and economic burdens. Therefore, systematically  
5 characterising the minimal tissue size that could provide adequate information with the least  
6 error is advantageous. Using uncertainty quantification and scale-dependence of  
7 morphological metrics applied to a variety of placental tissue samples, we identified a  
8 transition from microscopic fluctuations to tissue-scale properties at the mesoscale of  $\sim 200$   
9  $\mu\text{m}$  (Table 1). Thus, the smallest ROI volume required, without failing to comprehend the  
10 heterogeneous nature of the finest features of exchange villi in placental tissue, is of the order  
11 of magnitude of  $0.1 \text{ mm}^3$  (see Figure 4). Although, this smallest cut-off point might vary in  
12 other tissues with different geometric properties (e.g. larger blood vessels), the generic  
13 scale-dependence of the magnitude of 3D morphometric fluctuations (inversely  
14 proportional to the square root of the ROI volume, extending the results of [43]) is shown to  
15 be sufficiently universal for a wide class of porous media found in biological solute and gas  
16 exchangers. Future work is needed to further refine and extend the developed framework to  
17 placental pathologies and to other organs.

18 In conclusion, this paper offers both a novel approach and a validated workflow for  
19 massively multi-scale characterization of soft tissues with complex vascular networks. In  
20 addition, several detailed morphology and functional characteristics of our chosen model  
21 tissue, placenta, have been analysed in 3D. In future, these methods could be used to explore  
22 underlying causes of disease and inform potential future treatments.

23 This approach was enabled by a combination of innovative sample preparation, advanced  
24 synchrotron-based imaging, and state-of-the-art segmentation algorithms that bridge the  
25 gap of previously disconnected characterisation strategies using traditional X-ray  
26 tomography and angiography (cf. Figure 1A), light microscopy (cf. Figure 1B) and confocal  
27 or electron-microscopy (cf. Figure 1F). In the placental research arena the data generated  
28 here represents, for the first time, a multi-scale approach applied to characterise the  
29 architecture of both maternal and fetal domains by synchrotron micro-CT. Additionally, the

1 recommendations provided for future researchers should allow translating the workflow to  
2 quantify structures in other complex, soft tissues.

### 3 **IV. METHODS**

#### 4 **A. Specimen collection and preparation**

##### 5 ***Ex vivo* placental perfusion and preparation of tissue blocks**

6 *Ex vivo* dual perfusion of human placental cotyledons was conducted as previously described  
7 [42] from two pregnancies complicated by FGR and two from uncomplicated pregnancies  
8 (see Table S1). Briefly, placentas were collected within 30 minutes of delivery and the  
9 chorionic plate artery and vein corresponding to an intact cotyledon were each cannulated.  
10 A suitable cotyledon was selected on the basis of intactness following delivery. Peripheral  
11 cotyledons were not excluded. Fetal-side perfusion was commenced in an open circuit at 6  
12 mL/min with a modified Earle's bicarbonate buffer, gassed with 5% CO<sub>2</sub>/bal. N<sub>2</sub>. Following  
13 a quality control check at T=5 minutes that fetal-side venous outflow was ≥ 75% of fetal-side  
14 inflow, the maternal-side perfusion was commenced in open circuit at 14 mL/min with the  
15 same buffer, gassed with 21% O<sub>2</sub>/5% CO<sub>2</sub>/bal. N<sub>2</sub>, via a single glass cannula (i.d. =2 mm) held  
16 5 mm below the decidua surface. The maternal cannula was inserted at the centre of a  
17 placental cotyledon. For the tissue mass of ca. 30-40 g, this typically represented a random  
18 location of the insertion with respect to several villous trees within a cotyledon, below the  
19 decidual surface. The cotyledons continued to be perfused in open circuit for three hours  
20 prior to perfusion fixation from the maternal surface with Zinc 7 fixative [44] for 15 minutes.  
21 Various contrast reagents were infused into the fetal or maternal circulatory compartments  
22 (Table S1).

23 Colloidal dispersion of NiAl layered double hydroxide (LDH) "Yasuaki" resin was prepared  
24 following our previous report [45]. Briefly, NiCl<sub>2</sub>·6H<sub>2</sub>O and AlCl<sub>3</sub>·6H<sub>2</sub>O were dissolved in a  
25 mixture of EtOH and ultra-pure water followed by the addition of acetylacetone (acac). To  
26 this mixture, propylene oxide (PO) was added as an alkalization agent [46] and the container  
27 was sealed and kept at a room temperature (RT ~20°C). The obtained suspension was kept



1 in a freezer ( $-20^{\circ}\text{C}$ ) and then dried under a vacuumed condition ( $<10\text{ Pa}$ ), yielding dried NiAl  
2 LDH nanoparticles. To make up 5 mL of resin, the powdery NiAl LDH (1.0 g) was dispersed  
3 in ethanol (EtOH; 2.5 mL), and then methyltriethoxysilane (MTES; 2.0 mL) and tetraethyl  
4 orthosilicate (TEOS; 0.5 mL) were added to this mixture. Then,  $\text{H}_2\text{O}$  (0.7 mL) was added just  
5 before perfusion to initiate the gelation reaction. The procedures were performed under  
6 stirring at RT. This resin was applied immediately after fixing the lobule *in situ* within the  
7 perfusion cabinet, ahead of any other contrast reagents that might have been used.

8 On occasions a Batson's resin from the "Batson's no. 17 Anatomical Corrosion Kit"  
9 (Polysciences, Inc., Europe) was applied to the fetal circulation following perfusion. The  
10 liquid resin was prepared as a 20 mL base solution, 2.4 mL of catalyst and one drop of  
11 promoter; and manually injected via the chorionic plate arterial cannula until emergent at  
12 the chorionic plate vein cannula. Both cannulae were clamped and the whole lobule was  
13 allowed to polymerise overnight on iced water, within a sealed plastic bag.

14 The postperfusion fixed and post-contrast-infused cotyledon was excised from the non-  
15 perfused tissue and a 5 mm vertical slice of the cotyledon, adjacent to the inflow locus of the  
16 maternal cannula, was dissected from the cotyledon and fixed in a PFA fixative overnight to  
17 stiffen and further preserve the tissue. In all cases, following PFA diffusion fixing, 5 mm sized  
18 cubes were dissected from the vertical tissue sections and stored in sterile PBS. In some  
19 cases, the small blocks were infused with a further contrast agent, phosphotungstic acid  
20 (PTA), for several days or hours. In other cases, the cubes underwent CP-drying using an  
21 E3100 Critical Point Dryer (Quorum, UK), following manufacturer's instructions, and dipped  
22 into liquid nitrogen to freeze fracture a  $3 \times 3\text{ mm}^2$  cross-sectional sample for imaging, or  
23 prior to wax embedding.

24 The methods for processing whole-organ vascular casts (see Figure 1A) were as previously  
25 described [5].

### 26 **3D tomographic imaging**

27 At the Diamond Light Source (DLS) facility (Harwell, UK; Manchester Imaging Branchline,  
28 I13-2), in-line high-resolution synchrotron-sourced phase contrast micro-computed X-ray

1 tomography was used to generate images, following various methodologies to optimise  
2 image quality and feature extraction [47, 48]. Briefly, micro-computed tomography  
3 employed filtered (1.3 mm pyrolytic graphite and 3.2 mm Al filters) polychromatic X-ray  
4 beams with energy in the range of 8–30 keV to probe the samples. Transmitted X-rays  
5 produce visible light on striking a scintillator (500  $\mu\text{m}$  thick  $\text{CdWO}_4$ ) positioned between  
6 60–100 mm away, in-line with the sample. The light was then magnified with various  
7 objectives and imaged on a sCMOS (2560x2160 px) detector (pco.edge 5.5; PCO AG,  
8 Germany). Optical magnification of 8x was employed resulting in an effective isotropic px  
9 size of 0.81  $\mu\text{m}$ . In total, 3001–4001 X-ray projections were recorded over 0–180° rotation  
10 using exposure times between 80–200 ms. Projections were reconstructed into 3D datasets  
11 using a filtered-back projection algorithm [49] incorporating dark- and flat-field correction,  
12 ring artefact suppression and lens-blurring [50, 51].

13 Samples (3x3x3 mm<sup>3</sup> cubes) were prepared following various methodologies (see above  
14 and Table S1) to optimise image quality and feature extraction. Specimen 1 was ethanol  
15 dehydrated then CP-dried and imaged at RT (60 mm S-D distance, 3001 projections, 0.08 s  
16 exposure). Specimen 2 was plunge frozen into liquid nitrogen and imaged (60 mm S-D  
17 distance, 4001 projections, 0.15 s exposures) whilst maintaining a sample temperature of  
18  $-20^\circ\text{C}$  using a cold stage [52]. Specimen 3 was ethanol dehydrated then wax-embedded and  
19 imaged at RT (100 mm S-D distance, 4001 projections, 0.2 s exposure). Specimen 4 was PTA  
20 stained, ethanol dehydrated then wax-embedded and imaged at RT (10 mm S-D distance,  
21 4001 projections, 0.2 s exposure).

22

## 23 **B. Segmentation**

24 ‘Ground-truth’ training data for Specimen 1 was created using SuRVoS (Super Region  
25 Volume Segmentation Workbench) which applies a supervoxel segmentation strategy as  
26 described in [53]. A 256×256×256 px (0.21x0.21x0.21 mm) region of the full resolution  
27 volume was segmented for the fetoplacental vascular network and a 384×384×384 px  
28 (0.31x0.31x0.31 mm) region was segmented into the maternal and fetal blood volumes.  
29 These segmented regions along with the corresponding image data were then used to train

1 two separate 2D U-Net models for binary segmentation [54]. All aspects of model  
2 construction, training and data prediction were done using the fastai deep learning Python  
3 library [55]. The U-Net model architecture used a ResNet34 [56] encoder that accepts images  
4 of size 256×256 px and that had been pre-trained on the ImageNet dataset [57]. For model  
5 training, both the segmented label volumes and the corresponding data volumes were sliced  
6 into 2-dimensional images parallel to the xy, xz and yz planes. For each model, a randomised  
7 dataset was created from the pool of images with an 80%/20% split between training and  
8 validation image sets. The default fastai image transformations and augmentations were  
9 used. Model training was carried out using binary cross-entropy as the loss function and  
10 evaluated using the Intersection over Union (IoU/Jaccard) score as the metric on the  
11 validation set. For the vascular network data, training was carried out for 10 epochs giving  
12 a final IoU score of 0.93 on the validation set, the loss for the training set was 0.056 and the  
13 corresponding loss for the validation set was 0.052. For the maternal/fetal blood volumes,  
14 training was carried out for 15 epochs, giving a final IoU score of 0.93 on the validation set,  
15 the loss for the training set was 0.099 and the corresponding loss for the validation set was  
16 0.097.

17 To overcome the issues of using a 2-dimensional network to predict 3-dimensional  
18 segmentation, a data-averaging approach was developed. To generate the vascular network  
19 and maternal/fetal blood volume segmentations for the full 2520×2520×2120 px  
20 (2.05x2.05x1.72 mm) data, the image data volume was sliced into three stacks of 2-  
21 dimensional images parallel to the xy, xz and yz planes. The corresponding segmentation for  
22 each of these image stacks was predicted before being recombined back into a 3-dimensional  
23 dataset, thereby producing 3 separate segmented volumes. The image data volume was then  
24 rotated by 90 degrees around the 4-fold symmetry axis running perpendicular to the xy  
25 plane and the entire slicing and prediction process was repeated again. After 4 cycles of this  
26 process, the resulting 12 segmented volumes were summed and a final segmentation  
27 produced by applying a threshold to the data where there was agreement between 6 and  
28 more of the predictions in the case of the maternal/fetal blood volumes and between 9 and  
29 more of the predictions in the case of the blood vessels.

1 To segment the fetal tissue components from Specimen 2, the central region of the full  
2 resolution dataset (2520x2520x2120 px = 2.05x2.05x1.72 mm) was cropped to obtain a  
3 volume of 1500x1500x1500 px (1.22x1.22x1.22 mm) (see Supplementary Figure S3A),  
4 which was then down-sampled to obtain a volume of 750x750x750 px. This down-sampled,  
5 cropped volume was then split into eight sub-volumes, each of which were manually  
6 segmented using SuRVoS (Supplementary Figure S3B to S3D).

### 7 **C. Validation of semi-automated segmentation by U-Net**

8 To validate the U-Net prediction of fetal vascular network in Specimen 1, two different  
9 regions of 384x384x384 px (0.31x0.31x0.31 mm), which were located away from the  
10 original training data, were randomly chosen and SuRVoS-segmented manually. The  
11 similarities between the SuRVoS-segmentations and the U-Net predictions (Supplementary  
12 Figure S9A and S9B) were compared using the Sørensen–Dice score =  $2|M \cap U|/(|M| + |U|)$ ,  
13 which compares the area of the overlap ( $M \cap U$ ) to the average area of the manually-  
14 segmented ( $M$ ) and U-Net-predicted ( $U$ ) regions respectively (estimated for each slice).

15 To validate the U-Net prediction of the fetal tissue component in Specimen 1, a similar  
16 strategy was used. Dice scores were again calculated between two SuRVoS-segmented  
17 Validation Regions (256x256x256 px; 0.21x0.21x0.21 mm) and the U-Net prediction  
18 (Supplementary Figure S9C and S9D). The fetal tissue area fraction of individual slices was  
19 also compared between U-Net predictions and SuRVoS segmentations.

20 Supplementary Figure S9E and S9F show the Dice scores for fetal vascular network  
21 segmentation and fetal tissue segmentation respectively. The mean dice score for vascular  
22 validation Region #1 is 0.81 and that for vascular validation Region #2 is 0.88. Vascular  
23 Region #2 is likely to have a higher dice score because it contains fewer but larger vascular  
24 branches in comparison to vascular Region #1. The mean Dice scores for tissue validation  
25 Region #1 and Region #2 are 0.97 and 0.96 respectively. A higher dice score in the tissue  
26 regions as opposed to the vascular regions is expected because the vascular network  
27 segmentation has more boundaries than the tissue segmentation, where most discrepancies  
28 between U-Net and SuRVoS segmentation occur. The area fraction comparison for tissue

1 validation Region #1 and Region #2 (Supplementary Figure S9G) confirms the consistent  
2 agreement between U-Net prediction and SuRVoS segmentation.

### 3 **D. CT-based stereology**

4 Following synchrotron imaging of a placental block, capturing  $2520 \times 2520 \times 2120$  px<sup>3</sup> tissue  
5 (approximately 8 mm<sup>3</sup>) at  $\approx 80$   $\mu$ m slice intervals with an image resolution of 0.8125  $\mu$ m/px,  
6 systematic analysis of villous volume density and syncytiotrophoblast surface density was  
7 performed using a traditional stereology method, as described previously [58, 59]. Every  
8 100<sup>th</sup> image taken was imported into Image J software [60], providing 22 images in total  
9 (Figure S8A).

10

11 Within each image, a smaller  $1800 \times 1800$  px<sup>2</sup> field of view (FOV) was generated  
12 systematically (Figure S8B). A grid of 11x11 dots was superimposed on the FOV. The number  
13 of grid points hitting the villi and IVS was scored and the volume density of each of these  
14 morphological features was assessed using

$$15 \quad V_V = P_p / P_n,$$

16 where  $V_V$  is the volume fraction of the feature of interest,  $P_p$  is the number of points that hit  
17 features of interest, and  $P_n$  is the total number of test points in the grid [59].

18

19 From each synchrotron image, a smaller  $543 \times 543$  px<sup>2</sup> field of view (FOV) was generated  
20 systematically (Figure S8C). A grid of 10x10 crosses (line length: 12  $\mu$ m) was superimposed  
21 onto the FOV. In processing for surface density estimation, line intersects with the  
22 syncytiotrophoblast were scored ( $N = 100$  intersects per image,  $N = 22$  images). The  
23 horizontal lines were used as intercepts to estimate the specific surface area of  
24 syncytiotrophoblast  $S_{V(syn)}$  within tested volume:

$$25 \quad S_{V(syn)} = 2I_L,$$

26 where  $I_L$  is the intersection count fraction (the number of intersections with the villous  
27 boundary per unit length of test line) [61].



## 1 **E. 3D morphological analysis**

2 The structure of the fetal vascular network (Specimen 1) was analysed using Avizo software  
3 2020.1 (Thermo Fisher Scientific). Using the '*Centreline tree*' module which extracts the  
4 center lines of labelled 3D image volume as described in [62], the vascular network was  
5 skeletonized from placental tissue from the entire dataset of  $\approx 8 \text{ mm}^3$  (Figure 2A) and a small  
6 cropped region of  $\approx 0.2 \text{ mm}^3$  (Figure 2B). The vascular branching structure (length, diameter  
7 and tortuosity) of the entire network and a single connected tree inside the small cropped  
8 region was analysed. Only vessels with a diameter  $\geq 3 \text{ px}$  ( $2.4 \mu\text{m}$ ) were included since the  
9 vessels smaller than this could not be resolved.

10 To evaluate the size and connectivity of the porous region (maternal IVS), the '*Separate*  
11 *objects*' module (Avizo 2020.1) using a watershed method [63, 64] was employed on the  
12 labelled 3D image volume to separate the porous regions (Figure 2F). Afterwards, the '*Pore*  
13 *Network Model*' module (Avizo) [62-64] was applied to generate the spheres at separated  
14 porous regions. The centre of two spheres were connected by 'throat' (a throat is a region  
15 that connects two individual pores) (Figure 2G).

16 In analysing the maternal porous region, the central placental tissue region of  $\approx 1.8 \text{ mm}^3$  (see  
17 supplementary Figure S3A) and the porous region that encompasses the single connected  
18 tree (from Figure 2C) were used. Distributions of diameters of pores and throat, length of  
19 throat and number of pore coordination (how many pores are connected to an individual  
20 pore) were analysed to characterize the placental porous medium.

21 The tortuosity of porous regions was analysed using the '*Flow tortuosity*' module (Avizo)  
22 which computes the tortuosity based on the flow velocity vector field (the output of the  
23 '*Absolute Permeability Experiment Simulation*' module [62, 63]). The flow velocity vector was  
24 calculated using a fixed pressure drop across the domain (see below for more details).  
25 Porous tortuosity was computed with various minimal lengths and compared between  
26 Specimen 1 and 2.

27 Maternal blood flow into the IVS was simulated using the '*Absolute permeability experiment*  
28 *simulation*' module (Avizo 2020.1) which solves Stokes flow in a segmented intervillous

1 porous space geometry [62, 63]. The simulation was performed on the small cropped region  
2 of  $\approx 0.2 \text{ mm}^3$  (as described above). However, the dataset was downsampled (2x) as flow  
3 simulation on full resolution data would be computationally prohibitive. The simulations  
4 were done in three directions (x, y and z) across the tissue thickness of  $\approx 500 \text{ }\mu\text{m}$  (x and z  
5 directions) and  $\approx 950 \text{ }\mu\text{m}$  (y direction). Three simulations were performed with a fixed  
6 pressure gradient across the three principal directions (pressure drop of 10 Pa in the y, or 5  
7 Pa in the x and z directions respectively, accounting for  $\approx 1:2:1$  (x:y:z) aspect ratio; i.e.  $\approx 10$   
8 Pa/mm within tissue [28, 29]). The other four domain boundaries (in the transverse to the  
9 applied gradient direction) were assumed impermeable in each simulation, and a no-slip  
10 flow condition was used at the fluid-solid interfaces. A constant blood viscosity of  $0.003 \text{ Pa}\cdot\text{s}$   
11 was assumed. The calculated net flow rate was used to estimate the empirical hydraulic  
12 permeability in each principal direction from Darcy's law [62].

13 The area and volume fraction of segmented fetal tissue components from Specimen 1 and 2  
14 were analysed using the '*Volume fraction*' module (Avizo 2020.1). The surface area of  
15 segmented fetal tissue components was analysed using the '*Label analysis*' module (Avizo)  
16 which calculates the surface area of labelled regions from 3D image volume. The area  
17 fraction was analysed for individual slices. Volume fraction and surface area were analysed  
18 using different region of interest (ROI) sizes. To obtain the ROI cubes at different sizes, the  
19 tissue cubes with various x and y length and fixed z thickness ( $243.75 \text{ }\mu\text{m}$ ) were cropped  
20 without overlapping. For those ROI sizes with more than 1000 ROI cubes, a systematic  
21 random sampling method (picking  $n^{\text{th}}$  ROI cubes) was used in order to get 1000 random ROI  
22 cubes for statistical analysis. For those ROI sizes with fewer than 1000 cubes, all ROI cubes  
23 were included. The analysis was done for both Specimen 1 and 2 and performed on the  
24 central tissue region (as shown in supplementary Figure S3A).

## 25 **Statistical Handling**

26 For the purposes of stereology, a systematic random sampling protocol was used, where  
27 every 100th image from a stack of 2120 images was analysed for volume fraction and specific  
28 surface area (N=22 fields of view).

## 1 **ACKNOWLEDGMENTS**

2 This work was partially supported by the MRC (MR/N011538/1), EPSRC (EP/T008725/1),  
3 Wellcome Trust (212980/Z/18/Z) research grants. G.P. would like to acknowledge the  
4 EPSRC grant EP/M023877/1 and Great Britain Sasakawa Foundation for funding. Imaging  
5 was performed on the Branchline I13-2 of the Diamond Light Source synchrotron in  
6 Oxfordshire, UK, on beamtimes MG23941 and MG22562. The authors would like to thank  
7 beamline scientists Dr Andrew Bodey and Dr Shashi Marathe and collaborators Dr Saurabh  
8 Shah and Prof Peter D. Lee (University College London) for providing access to the cold-stage  
9 and assistance with setting up. We also thank Dr James Carr, Dr Tristan Lowe, Dr Kerstin  
10 Schirrmann, Ms Ruth Whelan-Jeans and Ms Saskia Port (University of Manchester) for their  
11 help with pre-synchrotron optimisation of micro-CT protocols and image analysis.  
12

## 13 **Author Contributions**

14 WMT performed 3D image segmentation, data analysis and simulations, created movies  
15 and wrote the manuscript.

16 GP contributed to project design, data collection and data analysis, proposed optimised  
17 pipeline for specimen preparation and data segmentation and wrote the manuscript.

18 GN and HB refined and performed the perfusion and specimen collection, processed tissue  
19 and prepared blocks for imaging, and performed stereological analysis.

20 ONFK developed the U-Net segmentation algorithm and wrote the manuscript.

21 MB supervised development of U-Net segmentation algorithm, data segmentation, data  
22 analysis and movie creation.

23 YT developed and manufactured Yasuaki's resin.

24 RML and EDJ contributed to the interpretation of results and provided critical feedback to  
25 shape the research, and wrote the manuscript.

26 PB conceived and designed the project, performed tissue sample collections, sample  
27 preparations and stereological analysis, contributed to the interpretation of the results,  
28 provided critical feedback, supervised the project and wrote the manuscript.

29 MCD supervised image segmentation, data analysis and simulations, contributed to the  
30 interpretation of the results, provided critical feedback, supervised the project and wrote

1 the manuscript.

2 ILC conceived and designed the project, designed and performed the scale dependence  
3 error analysis, contributed to the interpretation of the results, supervised the project and  
4 wrote the manuscript.

5 **All authors discussed the results and contributed to the writing of the manuscript.**

## 6 **Competing Interests**

7 The authors declare no competing interests.

## 8 **Data availability**

9 All data needed to evaluate the results and conclusions are present in the paper and/or the  
10 Supplementary Materials. The reconstructed micro-CT volumes (DLS ID 120077 and 13761),  
11 manual segmentations (DLS ID 120077) and the training data for U-net and predicted final  
12 segmentations (DLS ID 123861) will be released on public repository EMPIAR  
13 (<https://www.ebi.ac.uk/pdbe/emdb/empiar/>). The trained U-Net models for segmenting  
14 the maternal/fetal blood volumes and the blood vessels are openly available at  
15 <http://doi.org/10.5281/zenodo.4249627>. The associated computational codes can be  
16 accessed at <https://github.com/DiamondLightSource/python-placental-imaging>.  
17 Additional data related to this paper may be requested from the authors.

## 18 **REFERENCES**

- 19
- 20 [1] Lewis RM, Pearson-Farr JE. Multiscale three-dimensional imaging of the  
21 placenta. *Placenta*. 2020;  
22 <http://www.sciencedirect.com/science/article/pii/S0143400420300345>  
23
- 24 [2] Leiser R, Kosanke G, KP. Human placental vascularization. *Placenta basic Res Clin*  
25 *Appl*. 1991;  
26  
27
- 28 [3] Thunbo MØ, Sinding M, Korsager AS, Frøkjær JB, Østergaard LR, Petersen A, et  
29 al. Postpartum computed tomography angiography of the fetoplacental  
30 macrovasculature in normal pregnancies and in those complicated by fetal

- 1 growth restriction. *Acta Obstet Gynecol Scand.* 2018 Mar 1;97(3):322–9.  
2 <https://doi.org/10.1111/aogs.13289>  
3
- 4 [4] Aughwane R, Schaaf C, Hutchinson JC, Virasami A, Zuluaga MA, Sebire N, et al.  
5 Micro-CT and histological investigation of the spatial pattern of fetoplacental  
6 vascular density. *Placenta.* 2019/09/29. 2019 Dec;88:36–43.  
7 <https://pubmed.ncbi.nlm.nih.gov/31670095..>  
8
- 9 [5] Junaid TO, Bradley RS, Lewis RM, Aplin JD, Johnstone ED. Whole organ vascular  
10 casting and microCT examination of the human placental vascular tree reveals  
11 novel alterations associated with pregnancy disease. *Sci Rep.* 2017;7(1):4144.  
12
- 13 [6] Romina Plitman Mayo D. Stephen Charnock-Jones GJBMLO. Three-dimensional  
14 modeling of human placental terminal villi. *Placenta* (43);54-60. 2016.  
15
- 16 [7] Lisman BAM, van den Hoff MJB, Boer K, Bleker OP, van Groningen K, Exalto N.  
17 The architecture of first trimester chorionic villous vascularization: a confocal  
18 laser scanning microscopical study. *Hum Reprod.* 2007 Aug 1;22(8):2254–60.  
19 <https://doi.org/10.1093/humrep/dem143>.  
20
- 21 [8] Gough A, Stern AM, Maier J, Lezon T, Shun T-Y, Chennubhotla C, et al. Biologically  
22 Relevant Heterogeneity: Metrics and Practical Insights. *SLAS Discov Adv Sci*  
23 *Drug Discov.* 2017 Jan 6;22(3):213–37.  
24 <https://doi.org/10.1177/2472555216682725>  
25
- 26 [9] Uchida S. Image processing and recognition for biological images. *Dev Growth*  
27 *Differ.* 2013 May 1;55(4):523–49. <https://doi.org/10.1111/dgd.12054>.  
28
- 29 [10] Cohen AR. Extracting meaning from biological imaging data. *Mol Biol Cell.* 2014  
30 Nov 5;25(22):3470–3. <https://pubmed.ncbi.nlm.nih.gov/25368423>.  
31
- 32 [11] Jensen OE, Chernyavsky IL. Blood Flow and Transport in the Human Placenta.  
33 *Annu Rev Fluid Mech.* 2019 Jan 5;51(1):25–47.  
34 <https://doi.org/10.1146/annurev-fluid-010518-040219>.  
35
- 36 [12] Kertschanska S, Schröder H, Kaufmann P. The ultrastructure of the trophoblastic  
37 layer of the degu (*Octodon degus*) Placenta: a Re-evaluation of the ‘Channel  
38 Problem.’ *Placenta.* 1997;18(2):219–25.  
39 <https://www.sciencedirect.com/science/article/pii/S0143400497900965>.  
40

- 1 [13] Nordsletten DA, Blackett S, Bentley MD, Ritman EL, Smith NP. Structural  
2 morphology of renal vasculature. *Am J Physiol Circ Physiol*. 2006 Jul  
3 1;291(1):H296–309. <https://doi.org/10.1152/ajpheart.00814.2005>.  
4
- 5 [14] Skawina A, Litwin JA, Gorczyca J, Miodoński AJ. The vascular system of human  
6 fetal long bones: a scanning electron microscope study of corrosion casts. *J Anat*.  
7 1994 Oct;185 ( Pt 2(Pt 2):369–76. <https://pubmed.ncbi.nlm.nih.gov/7961142>.  
8
- 9 [15] Townsley MI. Structure and Composition of Pulmonary Arteries, Capillaries, and  
10 Veins. *Comprehensive Physiology*. 2012. p. 675–709. (Major Reference Works).  
11 <https://doi.org/10.1002/cphy.c100081>.  
12
- 13 [16] Atli İ, Gedik OS. Sine-Net: A fully convolutional deep learning architecture for  
14 retinal blood vessel segmentation. *Eng Sci Technol an Int J*. 2021;24(2):271–83.  
15 <https://www.sciencedirect.com/science/article/pii/S221509862030330X>.  
16
- 17 [17] Looney P, Stevenson GN, Nicolaidis KH, Plasencia W, Molloholli M, Natsis S, et  
18 al. Automatic 3D ultrasound segmentation of the first trimester placenta using  
19 deep learning. In: 2017 IEEE 14th International Symposium on Biomedical  
20 Imaging (ISBI 2017). 2017. p. 279–82.  
21
- 22 [18] Luo Z, Zhang Y, Zhou L, Zhang B, Luo J, Wu H. Micro-Vessel Image Segmentation  
23 Based on the AD-UNet Model. *IEEE Access*. 2019;7:143402–11.  
24
- 25 [19] Xianchenga W, Weia L, Bingyic M, Hed J, Jiangf Z, Xue W, et al. Retina Blood  
26 Vessel Segmentation Using A U-Net Based Convolutional Neural Network.  
27 *Procedia Comput Sci*. 2018.  
28
- 29 [20] Livne M, Rieger J, Aydin OU, Taha AA, Akay EM, Kossen T, et al. A U-Net Deep  
30 Learning Framework for High Performance Vessel Segmentation in Patients  
31 With Cerebrovascular Disease. *Front Neurosci*. 2019 Feb 28;13:97.  
32 <https://pubmed.ncbi.nlm.nih.gov/30872986>.  
33
- 34 [21] Han M, Bao Y, Sun Z, Wen S, Xia L, Zhao J, et al. Automatic Segmentation of  
35 Human Placenta Images With U-Net. *IEEE Access*. 2019;7:180083–92.  
36
- 37 [22] Sadda P, Imamoglu M, Dombrowski M, Papademetris X, Bahtiyar MO, Onofrey J.  
38 Deep-learned placental vessel segmentation for intraoperative video  
39 enhancement in fetoscopic surgery. *Int J Comput Assist Radiol Surg*.  
40 2019;14(2):227–35. <https://doi.org/10.1007/s11548-018-1886-4>.



- 1  
2 [23] Milletari F, Navab N, Ahmadi S-A. V-Net: Fully Convolutional Neural Networks  
3 for Volumetric Medical Image Segmentation. 2016 Fourth Int Conf 3D Vis. 2016.  
4  
5 [24] Hecksel CW, Darrow MC, Dai W, Galaz-Montoya JG, Chin JA, Mitchell PG, et al.  
6 Quantifying Variability of Manual Annotation in Cryo-Electron Tomograms.  
7 *Microsc Microanal*. 2016 Jun 26 [cited 2019 Oct 29];22(3):487–96.  
8 [https://www.cambridge.org/core/product/identifier/S1431927616000799/t](https://www.cambridge.org/core/product/identifier/S1431927616000799/type/journal_article)  
9 [ype/journal\\_article](https://www.cambridge.org/core/product/identifier/S1431927616000799/type/journal_article)  
10  
11 [25] James JL, Whitley GS, Cartwright JE. Pre-eclampsia: fitting together the  
12 placental, immune and cardiovascular pieces. *J Pathol*. 2010;221(4):363–78.  
13  
14 [26] Tun WM, Yap CH, Saw SN, James JL, Clark AR. Differences in placental capillary  
15 shear stress in fetal growth restriction may affect endothelial cell function and  
16 vascular network formation. *Sci Rep*. 2019;9(1):9876.  
17 <https://doi.org/10.1038/s41598-019-46151-6>.  
18  
19 [27] Erlich A, Nye GA, Brownbill P, Jensen OE, Chernyavsky IL. Quantifying the impact  
20 of tissue metabolism on solute transport in feto-placental microvascular  
21 networks. *Interface Focus*. 2019 Oct 6;9(5):20190021.  
22 <https://doi.org/10.1098/rsfs.2019.0021>.  
23  
24 [28] Burton GJ, Woods AW, Jauniaux E, Kingdom JCP. Rheological and Physiological  
25 Consequences of Conversion of the Maternal Spiral Arteries for Uteroplacental  
26 Blood Flow during Human Pregnancy. *Placenta*. 2009;30(6):473–82.  
27  
28 [29] Perazzolo S, Lewis RM, Sengers BG. Modelling the effect of intervillous flow on  
29 solute transfer based on 3D imaging of the human placental microstructure.  
30 *Placenta*. 2017 Dec;60:21–7.  
31 <http://www.sciencedirect.com/science/article/pii/S014340041731144X>.  
32  
33 [30] Alim K, Parsa S, Weitz DA, Brenner MP. Local Pore Size Correlations Determine  
34 Flow Distributions in Porous Media. *Phys Rev Lett*. 2017 Oct;119(14):144501.  
35 <https://link.aps.org/doi/10.1103/PhysRevLett.119.144501>.  
36  
37 [31] Dellschaft NS, Hutchinson G, Shah S, Jones NW, Bradley C, Leach L, et al. The  
38 haemodynamics of the human placenta in utero. *PLoS Biol*. 2020;18(5):1–21.  
39 <https://doi.org/10.1371/journal.pbio.3000676>.  
40

- 1 [32] Pearce P, Brownbill P, Janáček J, Jirkovská M, Kubínová L, Chernyavsky IL, et al.  
2 Image-Based Modeling of Blood Flow and Oxygen Transfer in Feto-Placental  
3 Capillaries. PLoS One. 2016;11(10):1–22.  
4 <https://doi.org/10.1371/journal.pone.0165369>.  
5
- 6 [33] Chernyavsky IL, Leach L, Dryden IL, Jensen OE. Transport in the placenta:  
7 homogenizing haemodynamics in a disordered medium. Philos Trans A Math  
8 Phys Eng Sci. 2011 Nov;369(1954):4162–82.  
9
- 10 [34] Roth CJ, Haeussner E, Ruebelmann T, Koch F v, Schmitz C, Frank H-G, et al.  
11 Dynamic modeling of uteroplacental blood flow in IUGR indicates vortices and  
12 elevated pressure in the intervillous space--a pilot study. Sci Rep. 2017;7:40771.  
13
- 14 [35] Choi JS, Yang H-J, Kim BS, Kim JD, Lee SH, Lee EK, et al. Fabrication of Porous  
15 Extracellular Matrix Scaffolds from Human Adipose Tissue. Tissue Eng Part C  
16 Methods. 2009 Jul 14;16(3):387–96.  
17 <https://doi.org/10.1089/ten.tec.2009.0276>  
18
- 19 [36] Song M, Liu Y, Hui L. Preparation and characterization of acellular adipose  
20 tissue matrix using a combination of physical and chemical treatments. Mol  
21 Med Rep. 2018;17(1):138–46. <https://doi.org/10.3892/mmr.2017.7857>.  
22
- 23 [37] Torres-Sanchez C, McLaughlin J, Fotticchia A. Porosity and pore size effect on  
24 the properties of sintered Ti35Nb4Sn alloy scaffolds and their suitability for  
25 tissue engineering applications. J Alloys Compd. 2018;731:189–99.  
26 <http://www.sciencedirect.com/science/article/pii/S0925838817334382>.  
27
- 28 [38] Wang S, Liu L, Li K, Zhu L, Chen J, Hao Y. Pore functionally graded Ti6Al4V  
29 scaffolds for bone tissue engineering application. Mater Des.  
30 2019;168:107643.  
31 <http://www.sciencedirect.com/science/article/pii/S0264127519300802>.  
32
- 33 [39] Palaiologou E, Goggin P, Chatelet DS, Lofthouse EM, Torrens C, Sengers BG, et al.  
34 Serial block-face scanning electron microscopy of erythrocytes protruding  
35 through the human placental syncytiotrophoblast. J Anat. 2017 Oct  
36 1;231(4):634–7. <https://doi.org/10.1111/joa.12658>.  
37
- 38 [40] Cunningham D, Morgan RJ, Mills PR, Nelson LM, Toner PG, Soukop M, et al.  
39 Functional and structural changes of the human proximal small intestine after  
40 cytotoxic therapy. J Clin Pathol. 1985 Mar 1;38(3):265 LP – 270.

- 1 <http://jcp.bmj.com/content/38/3/265.abstract>.
- 2
- 3 [41] Bearce EA, Grimes DT. On being the right shape: Roles for motile cilia and  
4 cerebrospinal fluid flow in body and spine morphology. *Semin Cell Dev Biol*.  
5 2021;110:104–12.  
6 <https://www.sciencedirect.com/science/article/pii/S1084952119301739>..  
7
- 8 [42] Brownbill P, Sebire N, McGillick E V, Ellery S, Murthi P. Ex Vivo Dual Perfusion  
9 of the Human Placenta: Disease Simulation, Therapeutic Pharmacokinetics and  
10 Analysis of Off-Target Effects BT - Preeclampsia : Methods and Protocols. In:  
11 Murthi P, Vaillancourt C, editors. New York, NY: Springer New York; 2018. p.  
12 173–89. [https://doi.org/10.1007/978-1-4939-7498-6\\_14](https://doi.org/10.1007/978-1-4939-7498-6_14).  
13
- 14 [43] Lu B, Torquato S. Local volume fraction fluctuations in heterogeneous media. *J*  
15 *Chem Phys*. 1990 Sep 1;93(5):3452–9. <https://doi.org/10.1063/1.458827>.  
16
- 17 [44] Lykidis D, Van Noorden S, Armstrong A, Spencer-Dene B, Li J, Zhuang Z, et  
18 al. Novel zinc-based fixative for high quality DNA, RNA and protein  
19 analysis. *Nucleic Acids Res* . 2007/06/18. 2007;35(12):e85–e85.  
20 <https://pubmed.ncbi.nlm.nih.gov/17576663>  
21
- 22 [45] Tokudome Y, Morimoto T, Tarutani N, Vaz PD, Nunes CD, Prevot V, et al.  
23 Layered Double Hydroxide Nanoclusters: Aqueous, Concentrated, Stable, and  
24 Catalytically Active Colloids toward Green Chemistry. *ACS Nano*. 2016 May  
25 24;10(5):5550–9. <https://doi.org/10.1021/acsnano.6b02110>..  
26
- 27 [46] Gash AE, Tillotson TM, Satcher JH, Poco JF, Hrubesh LW, Simpson RL. Use of  
28 Epoxides in the Sol–Gel Synthesis of Porous Iron(III) Oxide Monoliths from  
29 Fe(III) Salts. *Chem Mater*. 2001 Mar 1;13(3):999–1007.  
30 <https://doi.org/10.1021/cm0007611>.  
31
- 32 [47] Pešić ZD, Fanis A De, Wagner U, Rau C. Experimental stations at I13 beamline at  
33 Diamond Light Source. *J Phys Conf Ser*. 2013;425(18):182003.  
34 <http://dx.doi.org/10.1088/1742-6596/425/18/182003>.  
35
- 36 [48] Rau C, Wagner U, Pešić Z, De Fanis A. Coherent imaging at the Diamond beamline  
37 I13. *Phys status solidi*. 2011 Nov 1;208(11):2522–5.  
38 <https://doi.org/10.1002/pssa.201184272>.  
39

- 1 [49] Kak AC, Slaney M. Principles of computerized tomographic imaging. 2002.  
2
- 3 [50] Atwood RC, Bodey AJ, Price SWT, Basham M, Drakopoulos M. A high-  
4 throughput system for high-quality tomographic reconstruction of large  
5 datasets at Diamond Light Source. *Philos Trans R Soc A Math Phys Eng Sci*.  
6 2015 Jun 13;373(2043):20140398. <https://doi.org/10.1098/rsta.2014.0398>.  
7
- 8 [51] Strotton MC, Bodey AJ, Wanelik K, Darrow MC, Medina E, Hobbs C, et al.  
9 Optimising complementary soft tissue synchrotron X-ray microtomography for  
10 reversibly-stained central nervous system samples. *Sci Rep*. 2018;8(1):12017.  
11 <https://doi.org/10.1038/s41598-018-30520-8>.  
12
- 13 [52] Guo E, Zeng G, Kazantsev D, Rockett P, Bent J, Kirkland M, et al. Synchrotron X-  
14 ray tomographic quantification of microstructural evolution in ice cream – a  
15 multi-phase soft solid. *RSC Adv*. 2017;7(25):15561–73.  
16 <http://dx.doi.org/10.1039/C7RA00642J>.  
17
- 18 [53] Luengo I, Darrow MC, Spink MC, Sun Y, Dai W, He CY, et al. SuRVoS: Super-  
19 Region Volume Segmentation workbench. *J Struct Biol*. 2017;198(1):43–53.  
20 <http://www.sciencedirect.com/science/article/pii/S1047847717300308>.  
21
- 22 [54] Ronneberge O, Fischer P, Brox T. U-Net: Convolutional Networks for  
23 BiomedicalImage Segmentation. 2015.  
24
- 25 [55] Howard J, Gugger S. Fastai: A Layered API for Deep Learn. information. 2020.  
26
- 27 [56] He K, Zhang X, Ren S, Sun J. Deep Residual Learning for Image Recognition. 2016  
28 *IEEE Conf on492Computer Vis Pattern Recognit (CVP*. 2016).  
29
- 30 [57] Russakovsky O, Deng J, Su H, Krause J, Satheesh S, Ma S, et al. ImageNet Large  
31 Scale Visual Recognition Challenge. *Int J Comput Vis*. 2015;115(3):211–52.  
32 <https://doi.org/10.1007/s11263-015-0816-y>.  
33
- 34 [58] Brownbill P, Mahendran D, Owen D, Swanson P, Thornburg KL, Nelson DM, et  
35 al. Denudations as paracellular routes for alphafetoprotein and creatinine  
36 across the human syncytiotrophoblast. *Am J Physiol Integr Comp Physiol*. 2000  
37 Mar 1;278(3):R677–83. <https://doi.org/10.1152/ajpregu.2000.278.3.R677>.  
38
- 39 [59] Elias H, Hyde DM. An elementary introduction to stereology (quantitative  
40 microscopy). *Am J Anat*. 1980 Dec 1;159(4):411–46.

- 1                    <https://doi.org/10.1002/aja.1001590407>.
- 2
- 3            [60] Rueden CT, Schindelin J, Hiner MC, DeZonia BE, Walter AE, Arena ET, et al.  
4            ImageJ2: ImageJ for the next generation of scientific image data. BMC  
5            Bioinformatics. 2017;18(1):529. <https://doi.org/10.1186/s12859-017-1934-z>.  
6
- 7            [61] Baddeley A, Jensen EBV. Stereology for Statisticians. 2005.  
8
- 9            [62] Oluwadebi AG, Taylor KG, Ma L. A case study on 3D characterisation of pore  
10            structure in a tight sandstone gas reservoir: The Collyhurst Sandstone, East  
11            Irish Sea Basin, northern England. J Nat Gas Sci Eng. 2019;68:102917.  
12            <http://www.sciencedirect.com/science/article/pii/S1875510019301696>.  
13
- 14            [63] Zhang L, Jing W, Yang Y, Yang H, Guo Y, Sun H, et al. The Investigation of  
15            Permeability Calculation Using Digital Core Simulation Technology. Energies.  
16            2019;12.  
17
- 18            [64] Zhao Y, Zhu G, Zhang C, Liu S, Elsworth D, Zhang T. Pore-Scale Reconstruction  
19            and Simulation of Non-Darcy Flow in Synthetic Porous Rocks. J Geophys Res  
20            Solid Earth. 2018 Apr 1;123(4):2770–86.  
21            <https://doi.org/10.1002/2017JB015296>.  
22
- 23            [65] Coker DA, Torquato S. Extraction of morphological quantities from a digitized  
24            medium. J Appl Phys. 1995 Jun 15;77(12):6087–99.  
25            <https://doi.org/10.1063/1.359134>.  
26
- 27            [66] Doi M. A New Variational Approach to the Diffusion and the Flow Problem in  
28            Porous Media. J Phys Soc Japan. 1976 Feb 15;40(2):567–72.  
29            <https://doi.org/10.1143/JPSJ.40.567>.  
30
- 31            [67] Erlich A, Pearce P, Mayo RP, Jensen OE, Chernyavsky IL. Physical and geometric  
32            determinants of transport in fetoplacental microvascular networks. Sci Adv.  
33            2019 Apr 17;5(4): eaav6326–eaav6326.  
34            <https://pubmed.ncbi.nlm.nih.gov/31001587>.  
35  
36
- 37
- 38
